# Supplementary material
Source: PubMed Central journal article supplement (PMC3390464)

# Supplementary Material

## Labdane Diterpenoids from *Leonotis leonurus*

Hankui Wu<sup>a,d</sup>, Jun Li<sup>a</sup>, Frank R. Fronczek<sup>e</sup>, Daneel Ferreira<sup>a,b</sup>, Charles L. Burandt Jr<sup>c</sup>, Vincent Setola<sup>f</sup>, Bryan L. Roth<sup>f</sup>, and Jordan K. Zjawiony<sup>a,b,\*</sup>

<sup>a</sup>*Department of Pharmacognosy, School of Pharmacy, University of Mississippi, University, MS 38677-1848, USA*

<sup>b</sup>*Research Institute of Pharmaceutical Sciences, School of Pharmacy, University of Mississippi, University, MS 38677-1848, USA*

<sup>c</sup>*National Center for Natural Products Research, University of Mississippi, University, MS 38677-1848, USA*

<sup>d</sup>*College of Chemistry and Chemical Engineering, Anyang Normal University, Anyang 455002, China,*

<sup>e</sup>*Department of Chemistry, Louisiana State University, Baton Rouge, LA 70803-1804, USA*

<sup>f</sup>*Department of Pharmacology, School of Medicine and NIMH Psychoactive drug Screening Program, University of North Carolina, Chapel Hill, NC 27599, USA*

\*To whom correspondence should be addressed. Tel: +1 662 915 7290. Fax: +1 662 915 6975. E-mail address: [jordan@olemiss.edu](mailto:jordan@olemiss.edu)

- S1. <sup>1</sup>H NMR (400 MHz, CDCl<sub>3</sub>) spectrum of the new compound **1**
- S2. <sup>13</sup>C NMR (100 MHz, CDCl<sub>3</sub>) spectrum of **1**
- S3. DEPT135 spectrum of **1**
- S4. <sup>1</sup>H NMR (400 MHz, CDCl<sub>3</sub>) spectrum of the new compound **2**
- S5. <sup>13</sup>C NMR (100 MHz, CDCl<sub>3</sub>) spectrum of the new compound **2**
- S6. DEPT135 spectrum of **2**
- S7. <sup>1</sup>H NMR (400 MHz, CDCl<sub>3</sub>) spectrum of the new compound **3**
- S8. <sup>13</sup>C NMR (100 MHz, CDCl<sub>3</sub>) spectrum of the new compound **3**
- S9. DEPT135 spectrum of **3**
- S10. <sup>1</sup>H NMR (400 MHz, CDCl<sub>3</sub>) spectrum of the new compound **4**
- S11. <sup>13</sup>C NMR (100 MHz, CDCl<sub>3</sub>) spectrum of the new compound **4**
- S12. DEPT135 spectrum of **4**
- S13. <sup>1</sup>H NMR (400 MHz, CDCl<sub>3</sub>) spectrum of the new compound **5**
- S14. <sup>13</sup>C NMR (100 MHz, CDCl<sub>3</sub>) spectrum of the new compound **5**
- S15. DEPT135 spectrum of **5**
- S16. <sup>1</sup>H NMR (400 MHz, CDCl<sub>3</sub>) spectrum of the new compound **6**
- S17. <sup>13</sup>C NMR (100 MHz, CDCl<sub>3</sub>) spectrum of the new compound **6**
- S18. DEPT135 spectrum of **6**
- S19. <sup>1</sup>H NMR (400 MHz, CDCl<sub>3</sub>) spectrum of the new compound **7**
- S20. <sup>13</sup>C NMR (100 MHz, CDCl<sub>3</sub>) spectrum of the new compound **7**
- S21. DEPT135 spectrum of **7**
- S22. <sup>1</sup>H NMR (400 MHz, CDCl<sub>3</sub>) spectrum of the new compound **8**
- S23. <sup>13</sup>C NMR (100 MHz, CDCl<sub>3</sub>) spectrum of the new compound **8**
- S24. DEPT135 spectrum of **8**
- S25. <sup>1</sup>H NMR (400 MHz, CDCl<sub>3</sub>) spectrum of compound **9**
- S26. <sup>13</sup>C NMR (100 MHz, CDCl<sub>3</sub>) spectrum of compound **9**
- S27. DEPT135 spectrum of **9**
- S28. <sup>1</sup>H NMR (400 MHz, CDCl<sub>3</sub>) spectrum of compound **10**
- S29. <sup>13</sup>C NMR (100 MHz, CDCl<sub>3</sub>) spectrum of compound **10**
- S30. DEPT135 spectrum of **10**
- S31. <sup>1</sup>H NMR (400 MHz, CDCl<sub>3</sub>) spectrum of compound **11**
- S32. <sup>13</sup>C NMR (100 MHz, CDCl<sub>3</sub>) spectrum of compound **11**
- S33. DEPT135 spectrum of **11**

S1.  $^1\text{H}$  NMR (400 MHz,  $\text{CDCl}_3$ ) spectrum of the new compound **1**

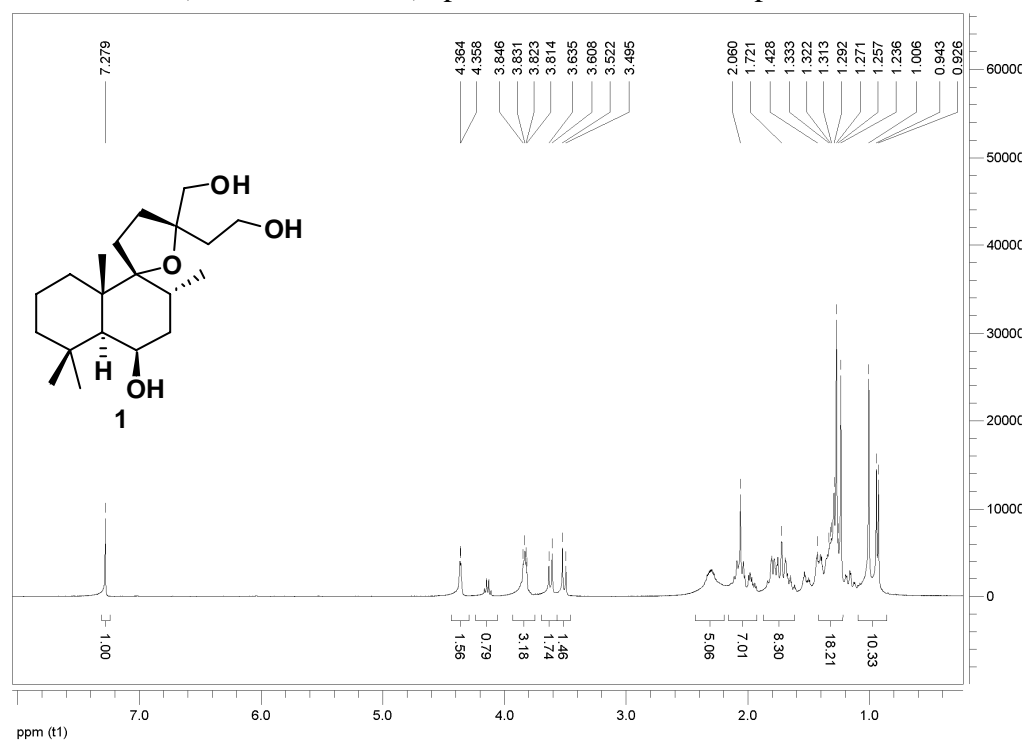

S2.  $^{13}\text{C}$  NMR (100 MHz,  $\text{CDCl}_3$ ) spectrum of the new compound **1**

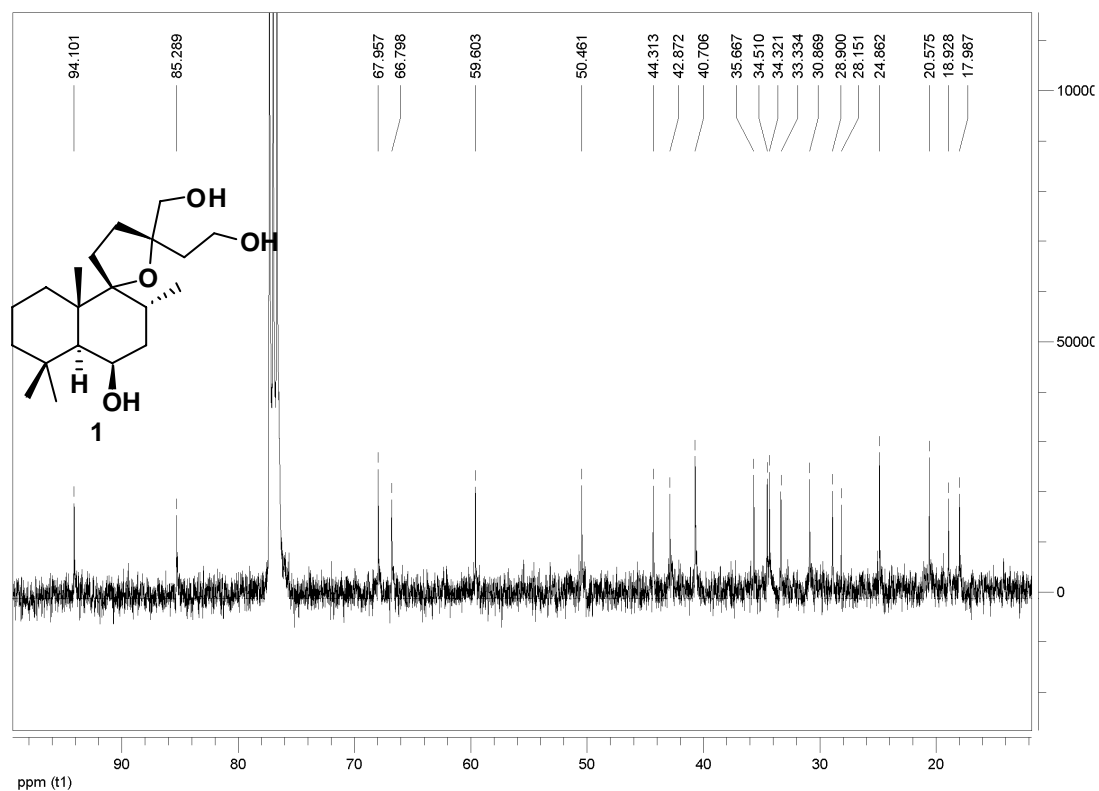

S3. DEPT135 spectrum of **1**

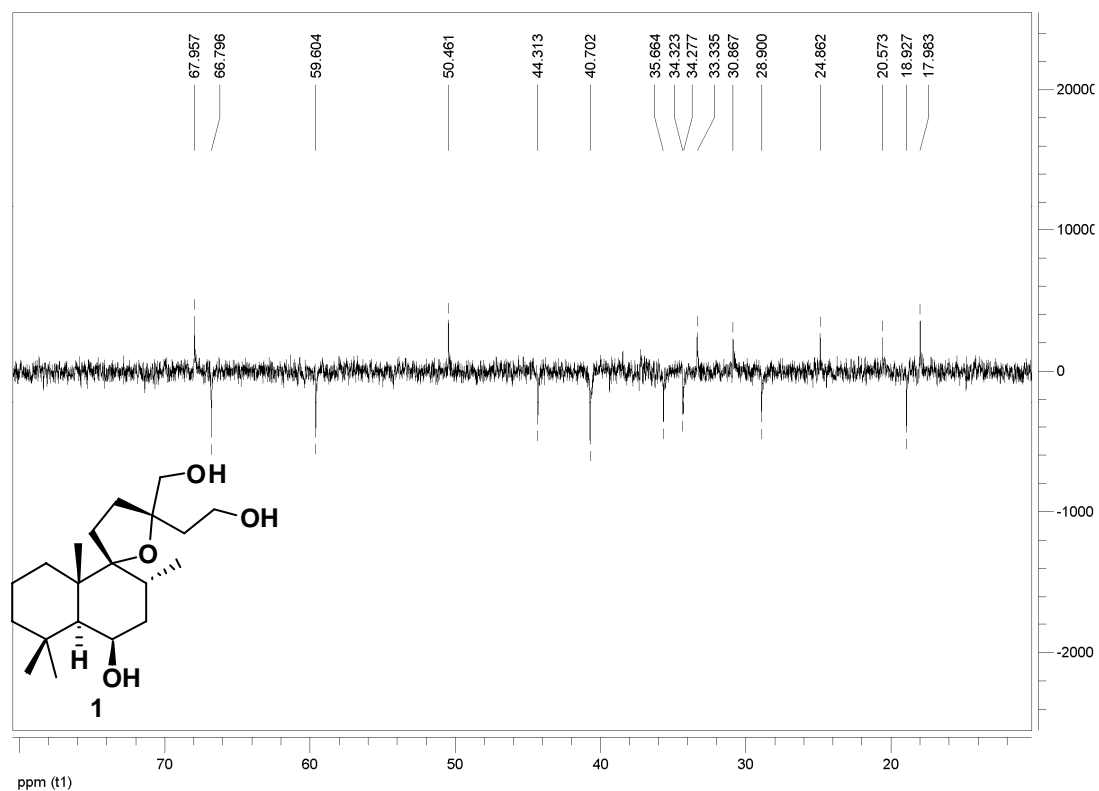

S4.  $^1\text{H}$  NMR (400 MHz,  $\text{CDCl}_3$ ) spectrum of the new compound **2**

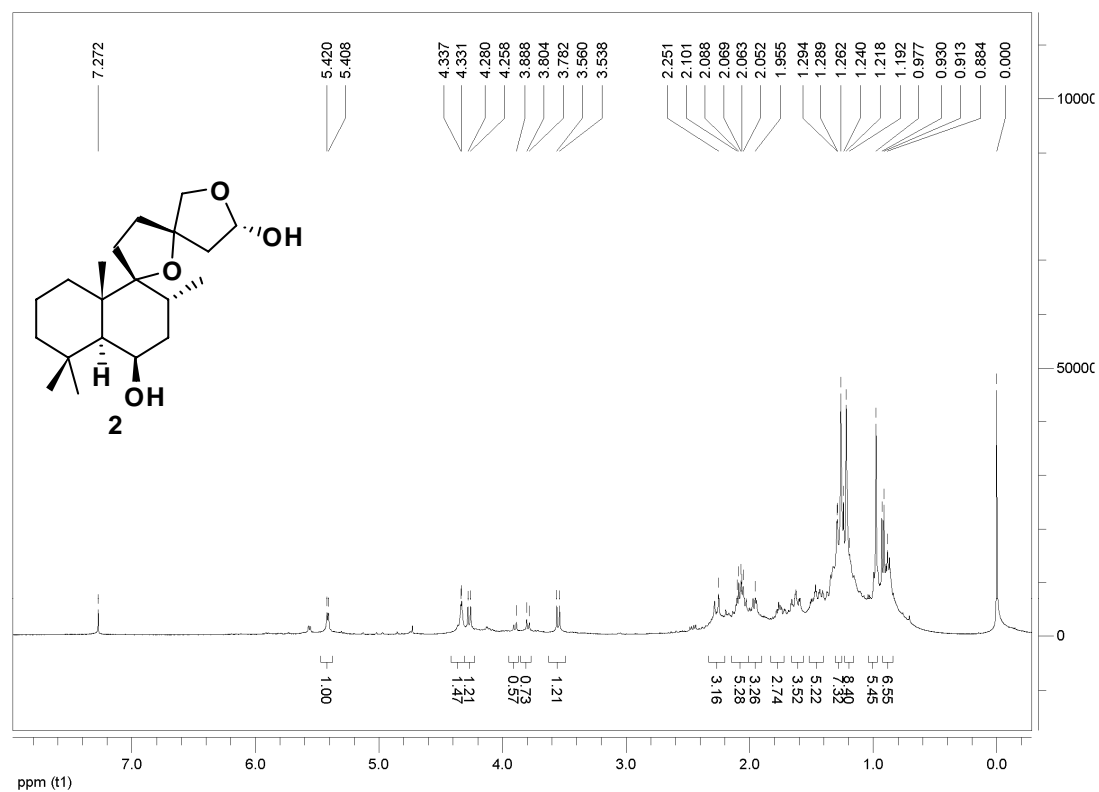

S5.  $^{13}\text{C}$  NMR (100 MHz,  $\text{CDCl}_3$ ) spectrum of the new compound **2**

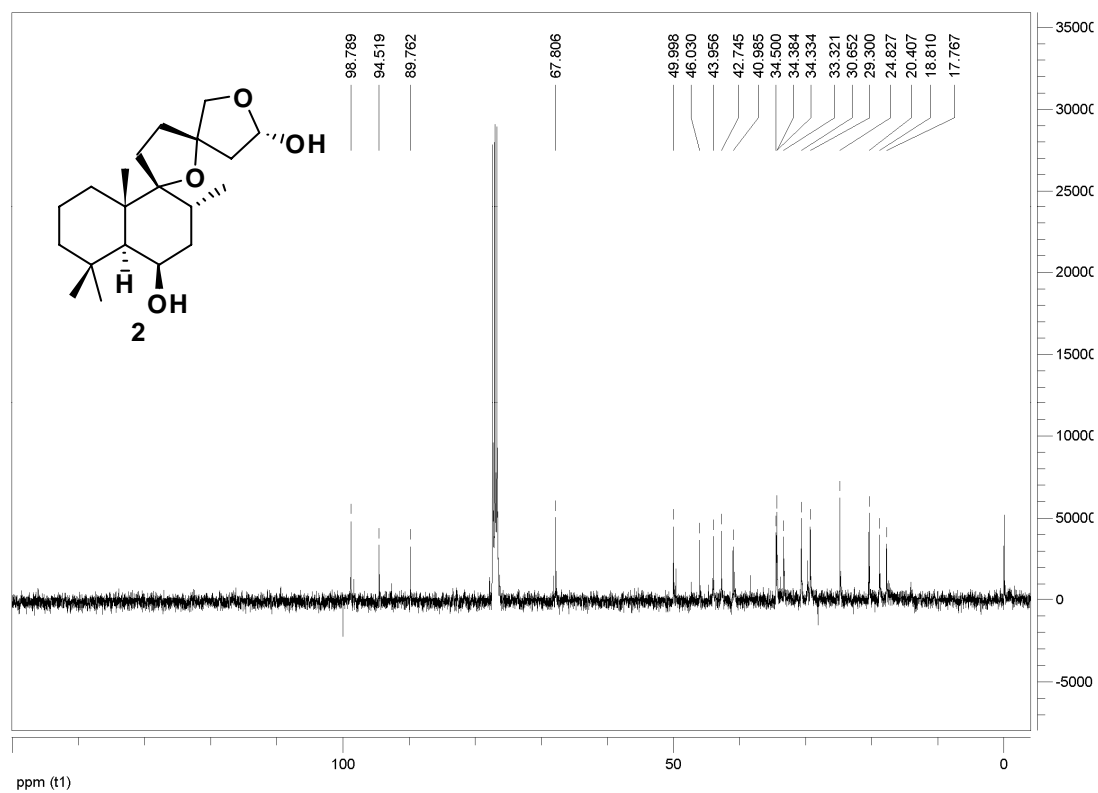

S6. DEPT135 spectrum of **2**

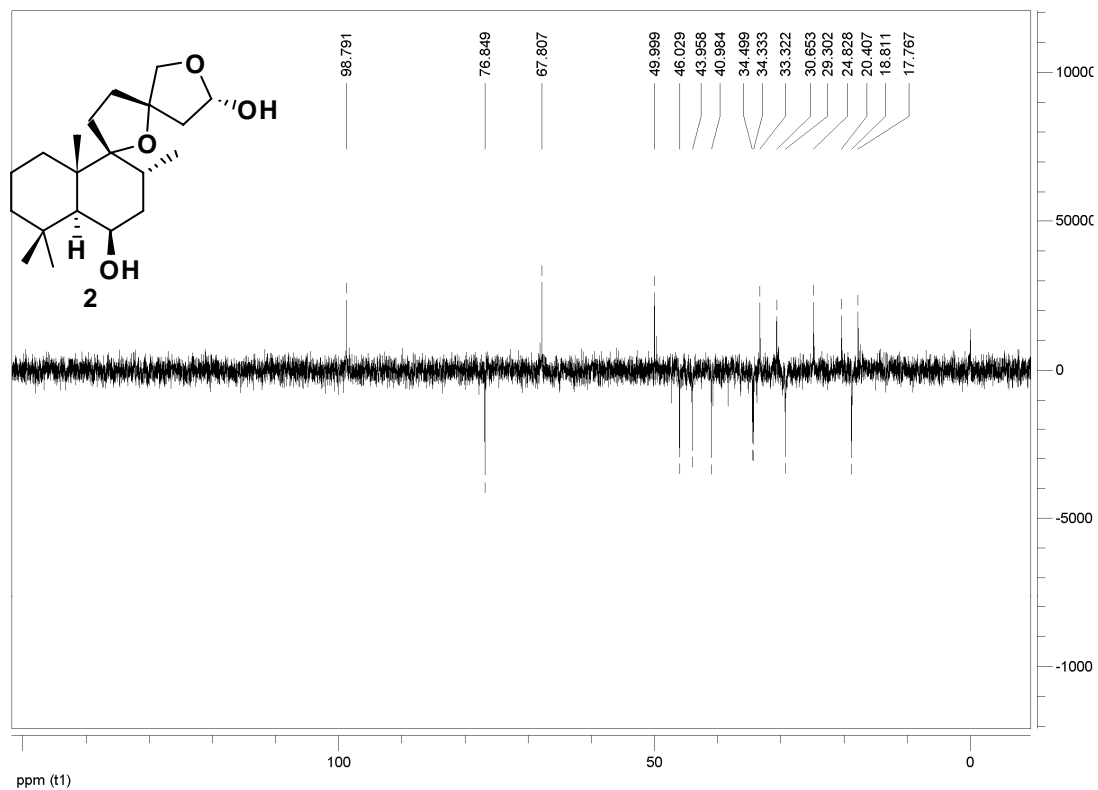

S7.  $^1\text{H}$  NMR (400 MHz,  $\text{CDCl}_3$ ) spectrum of the new compound **3**

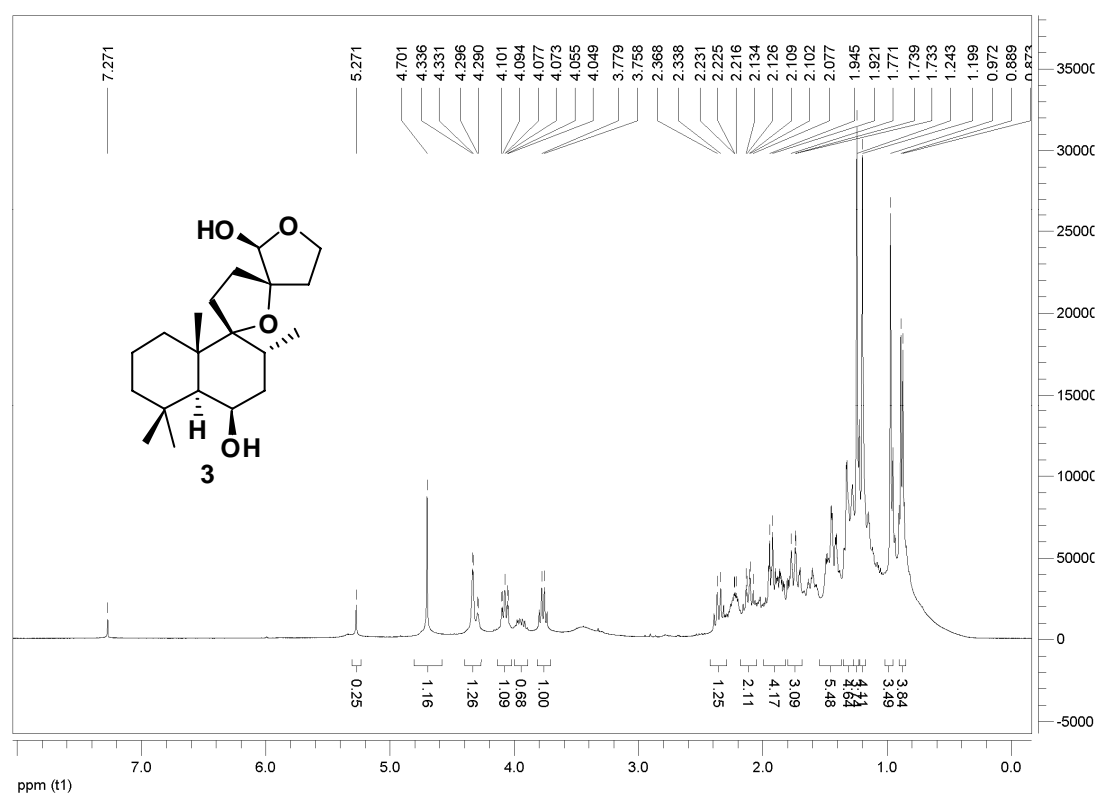

S8.  $^{13}\text{C}$  NMR (100 MHz,  $\text{CDCl}_3$ ) spectrum of the new compound **3**

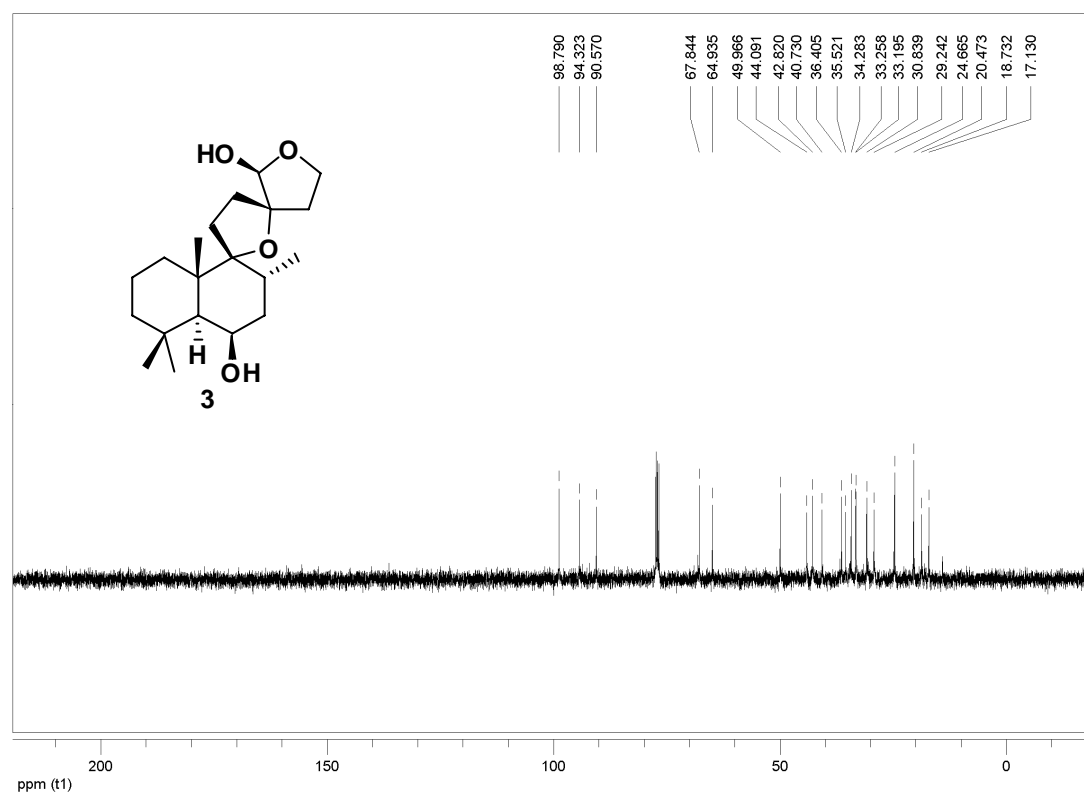

S9. DEPT135 spectrum of **3**

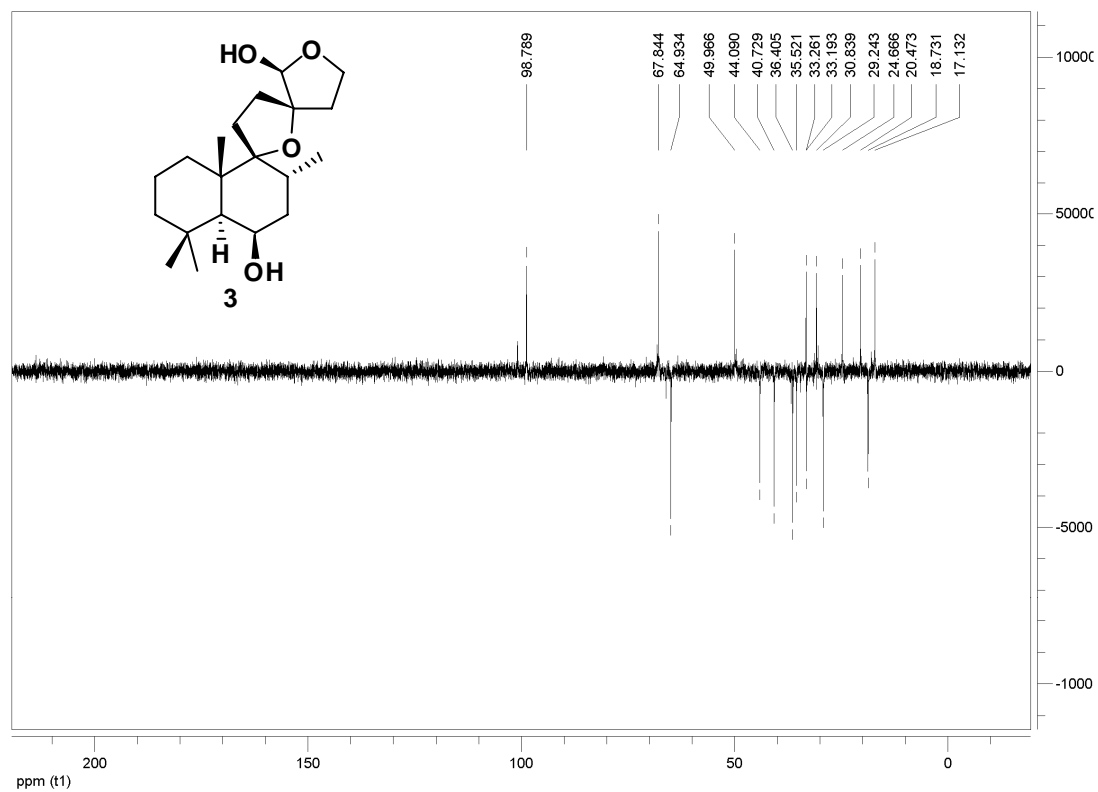

S10.  $^1\text{H}$  NMR (400 MHz,  $\text{CDCl}_3$ ) spectrum of the new compound **4**

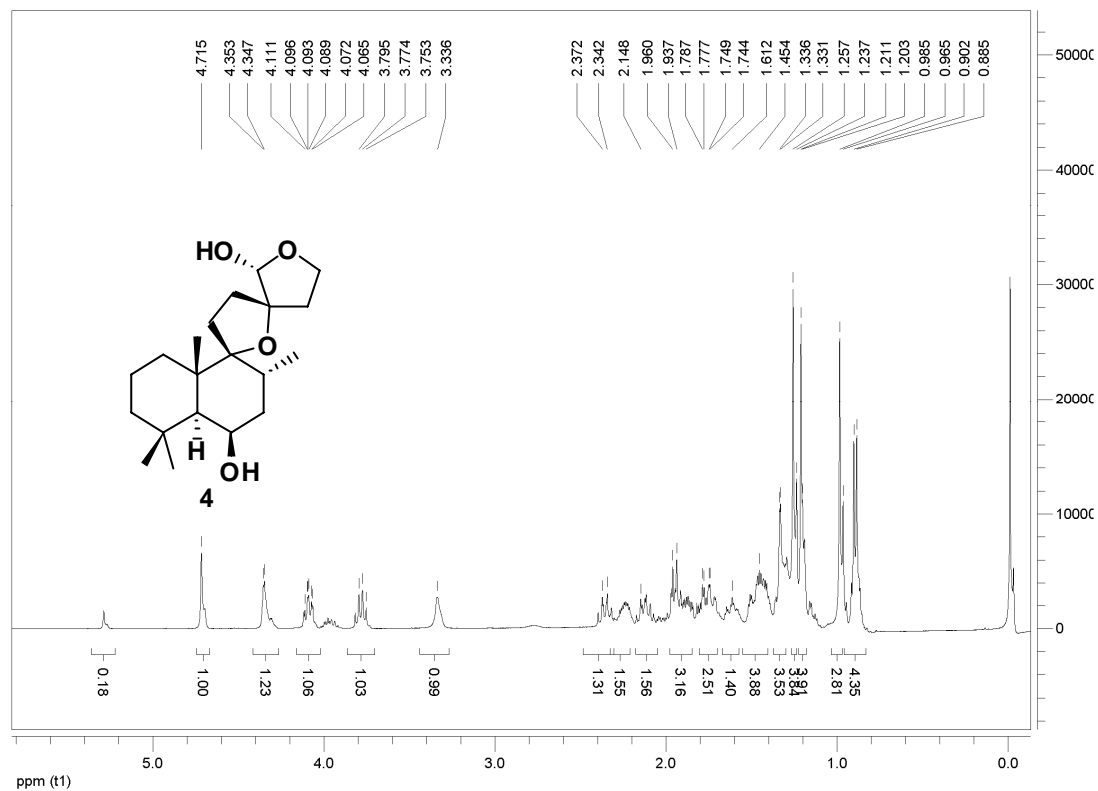

S11.  $^{13}\text{C}$  NMR (100 MHz,  $\text{CDCl}_3$ ) spectrum of the new compound **4**

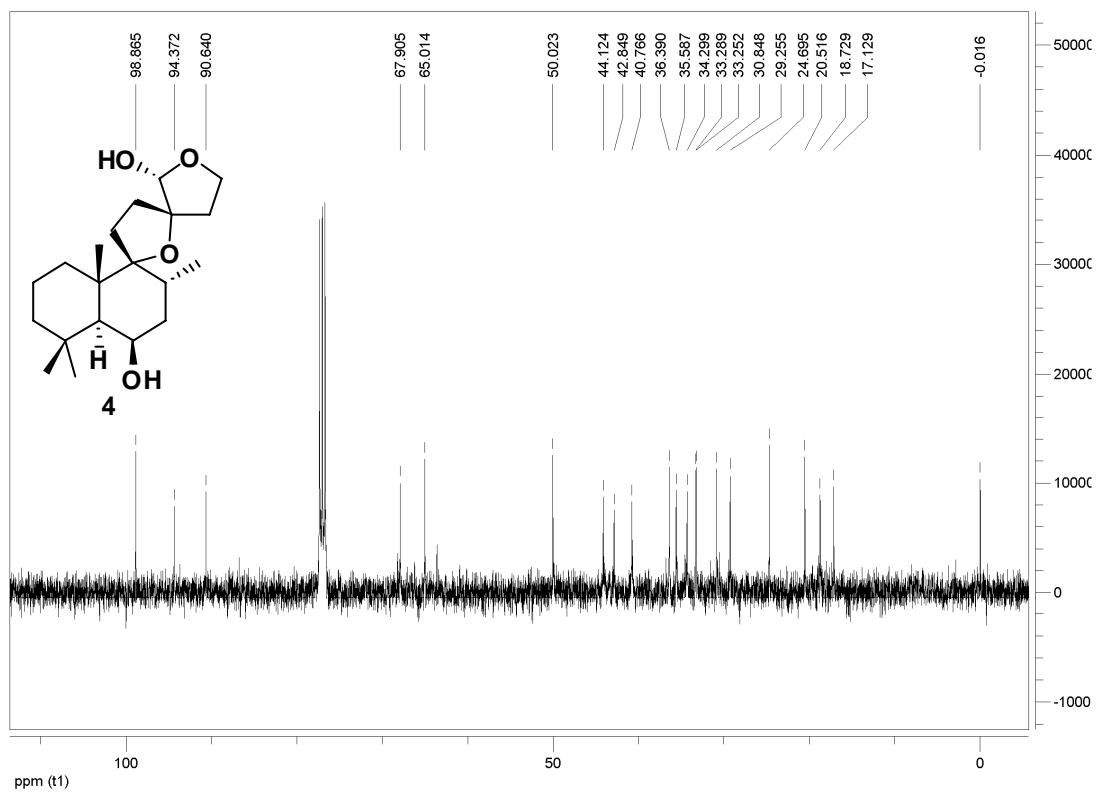

S12. DEPT135 spectrum of **4**

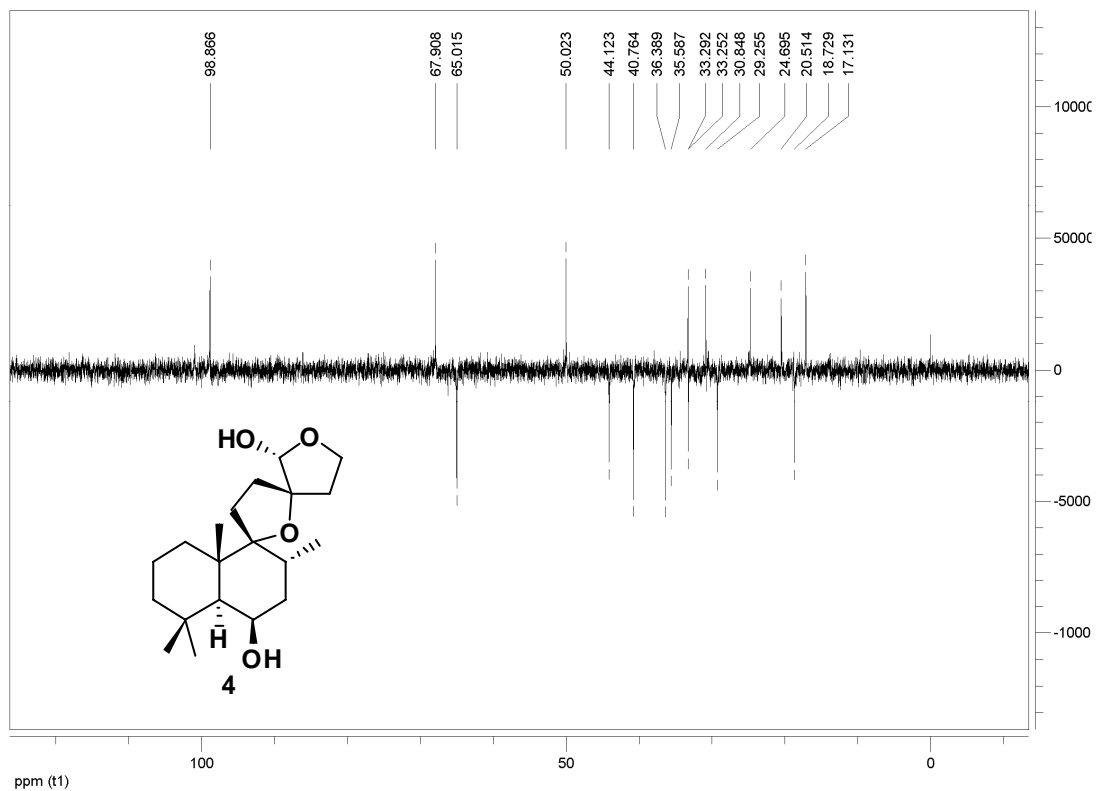



S13.  $^1\text{H}$  NMR (400 MHz,  $\text{CDCl}_3$ ) spectrum of the new compound **5**

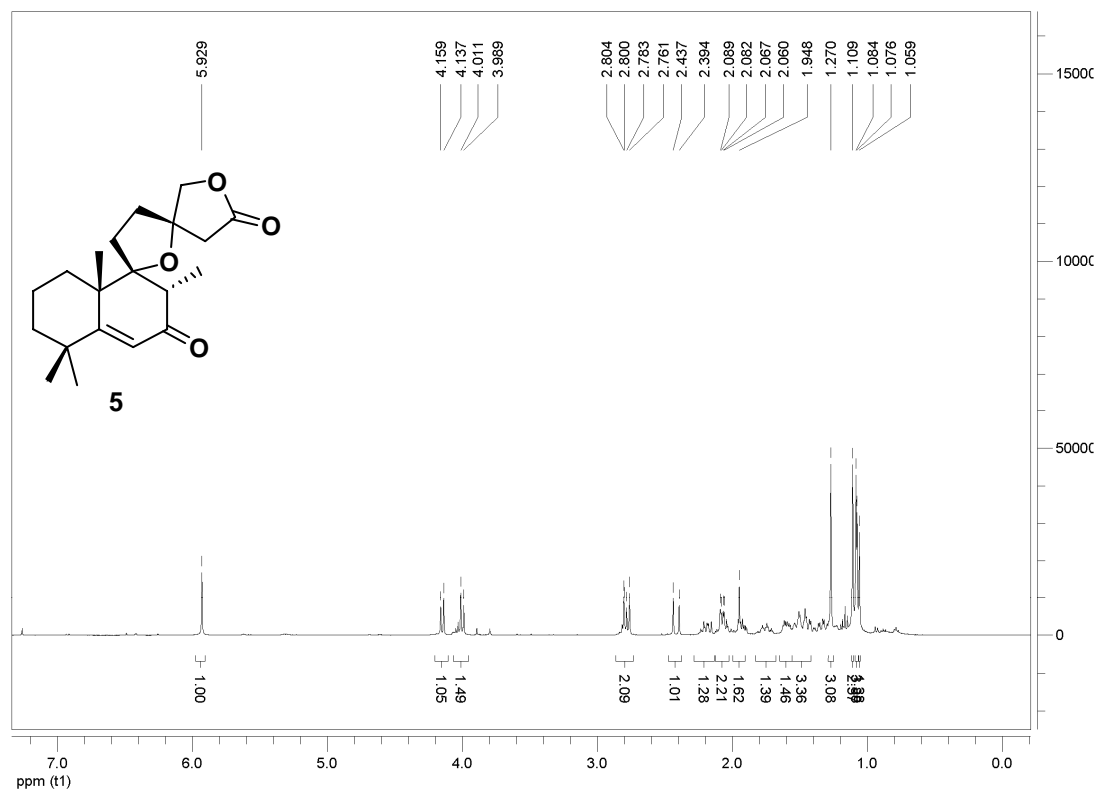

S14.  $^{13}\text{C}$  NMR (100 MHz,  $\text{CDCl}_3$ ) spectrum of the new compound **5**

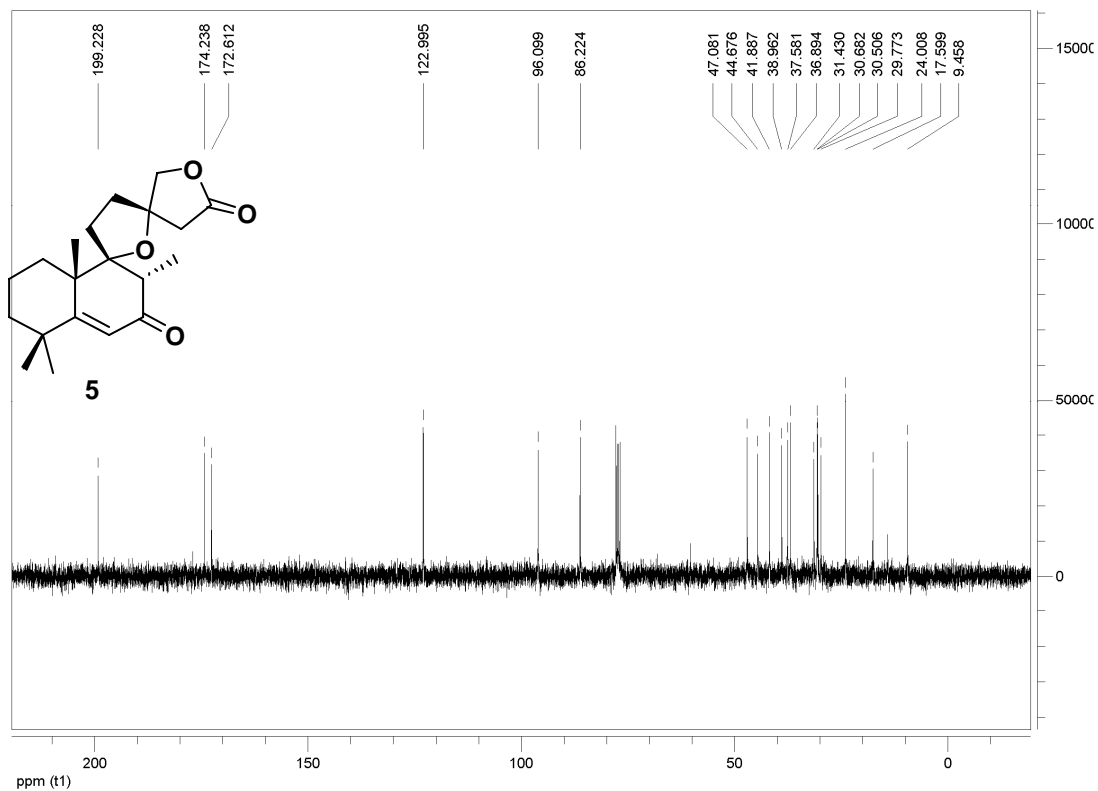

S15. DEPT135 spectrum of **5**

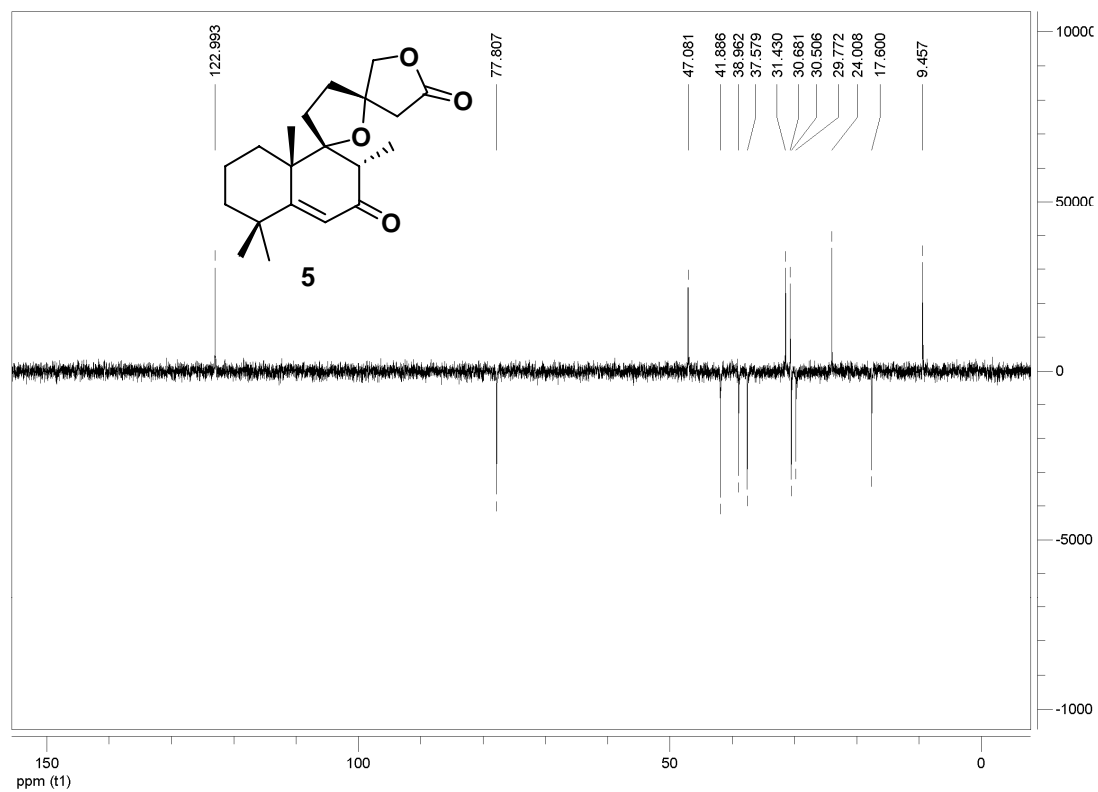

S16.  $^1\text{H}$  NMR (400 MHz,  $\text{CDCl}_3$ ) spectrum of the new compound **6**

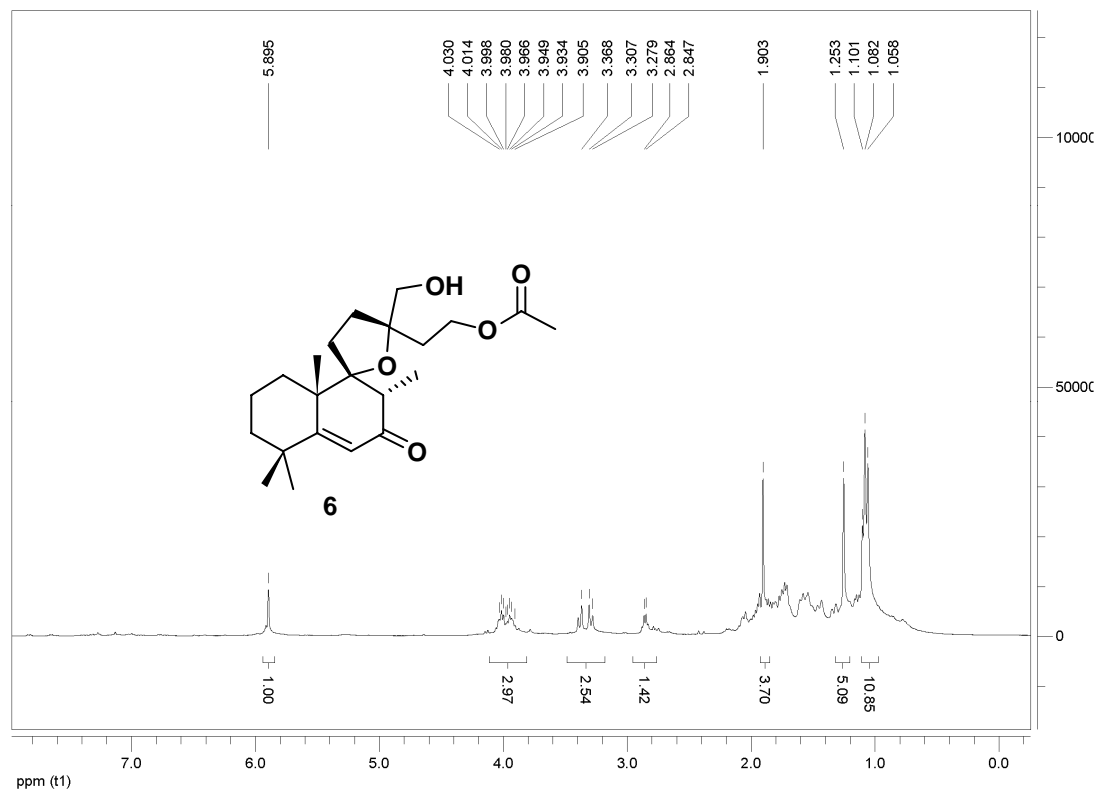

S17.  $^{13}\text{C}$  NMR (100 MHz,  $\text{CDCl}_3$ ) spectrum of the new compound **6**

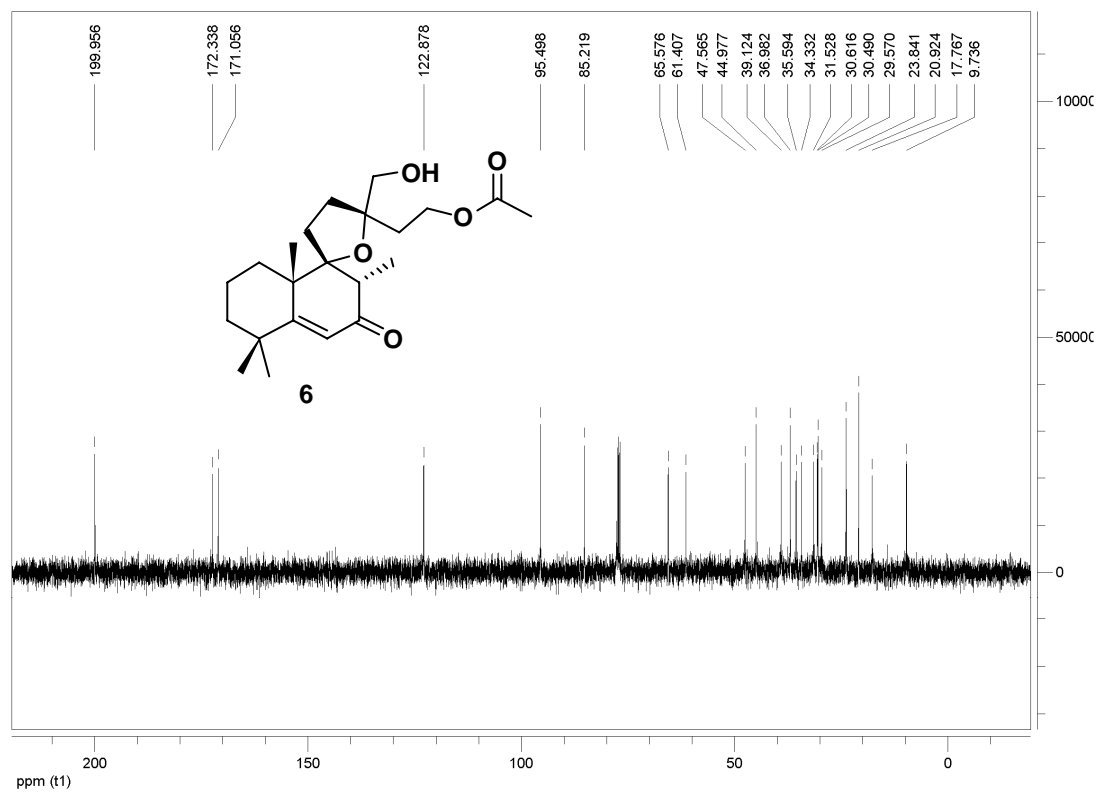

S18. DEPT135 spectrum of **6**

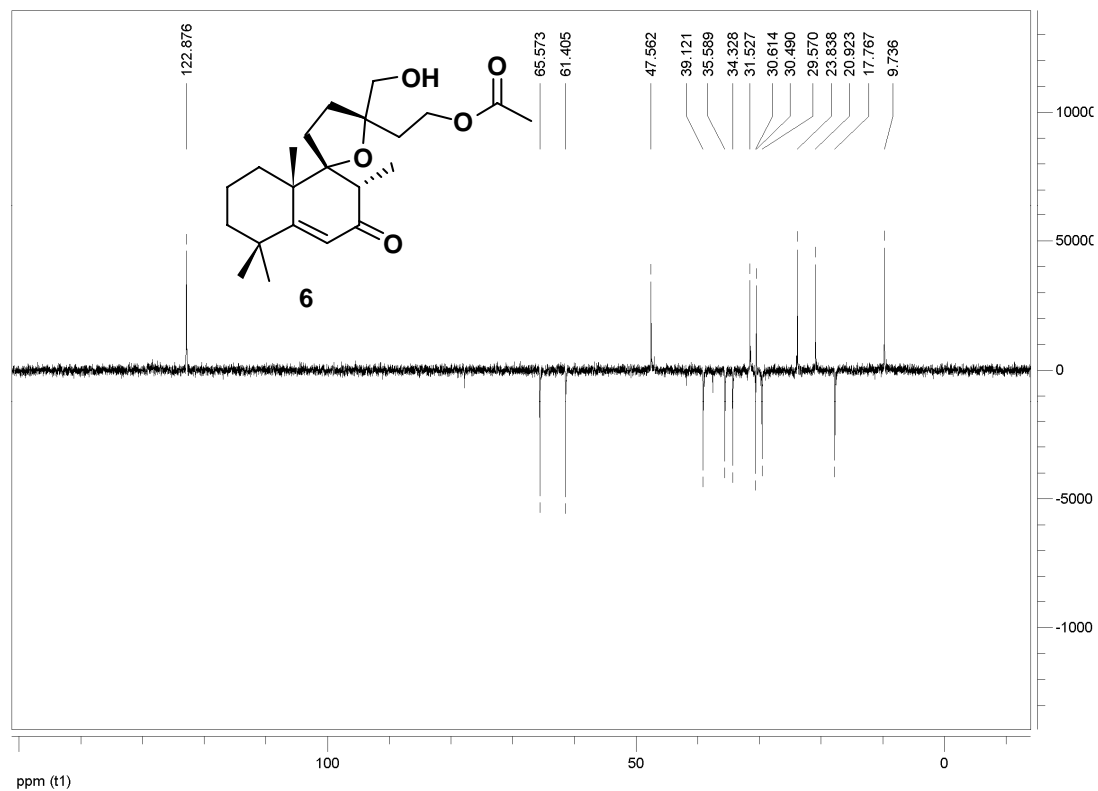

S19.  $^1\text{H}$  NMR (400 MHz,  $\text{CDCl}_3$ ) spectrum of the new compound **7**

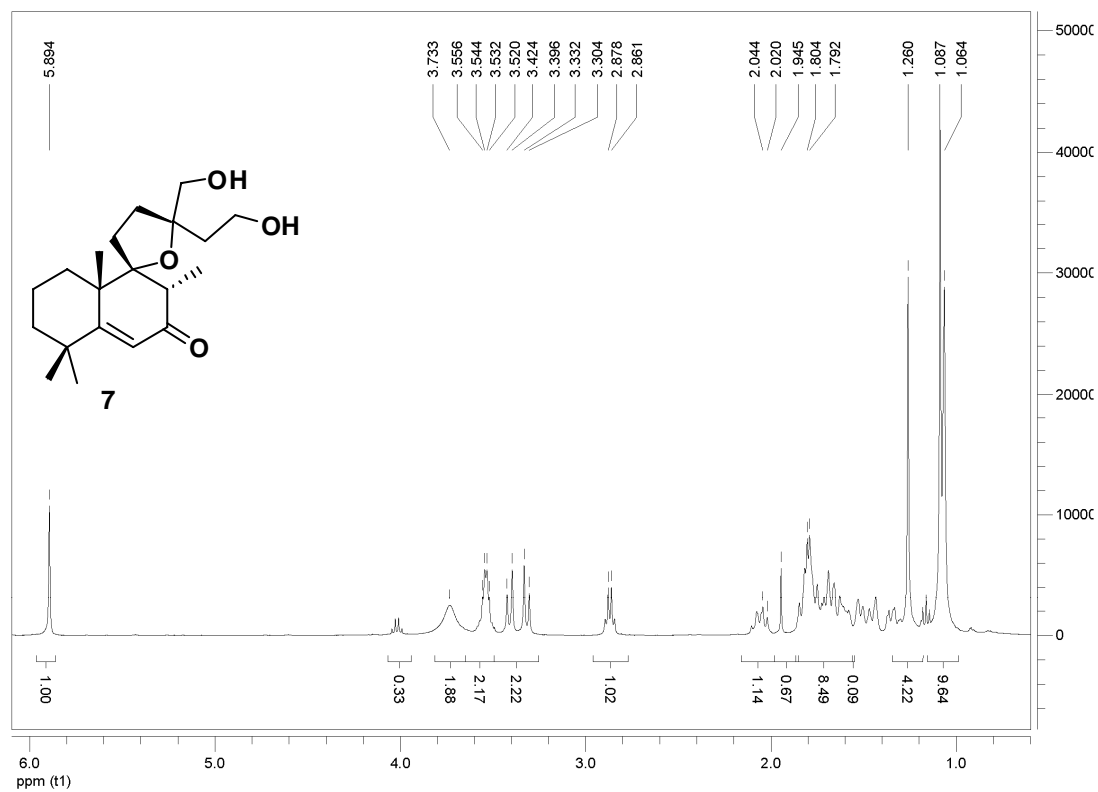

S20.  $^{13}\text{C}$  NMR (100 MHz,  $\text{CDCl}_3$ ) spectrum of the new compound **7**

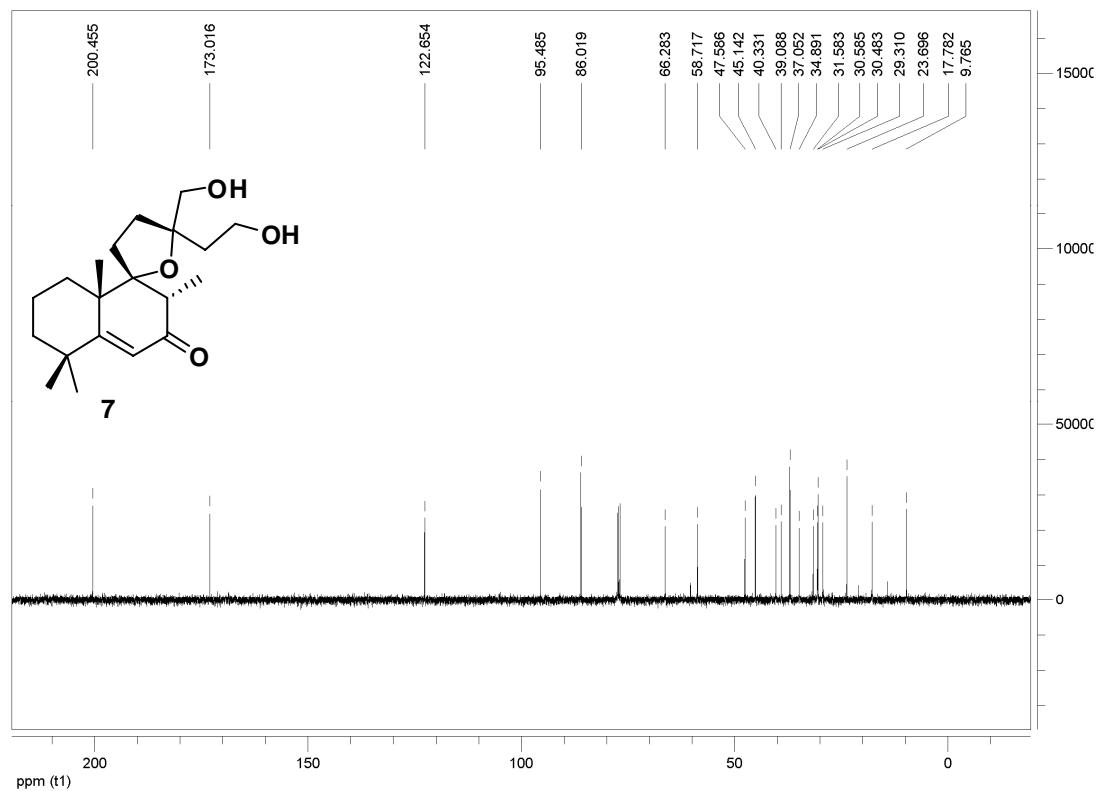

S21. DEPT135 spectrum of **7**

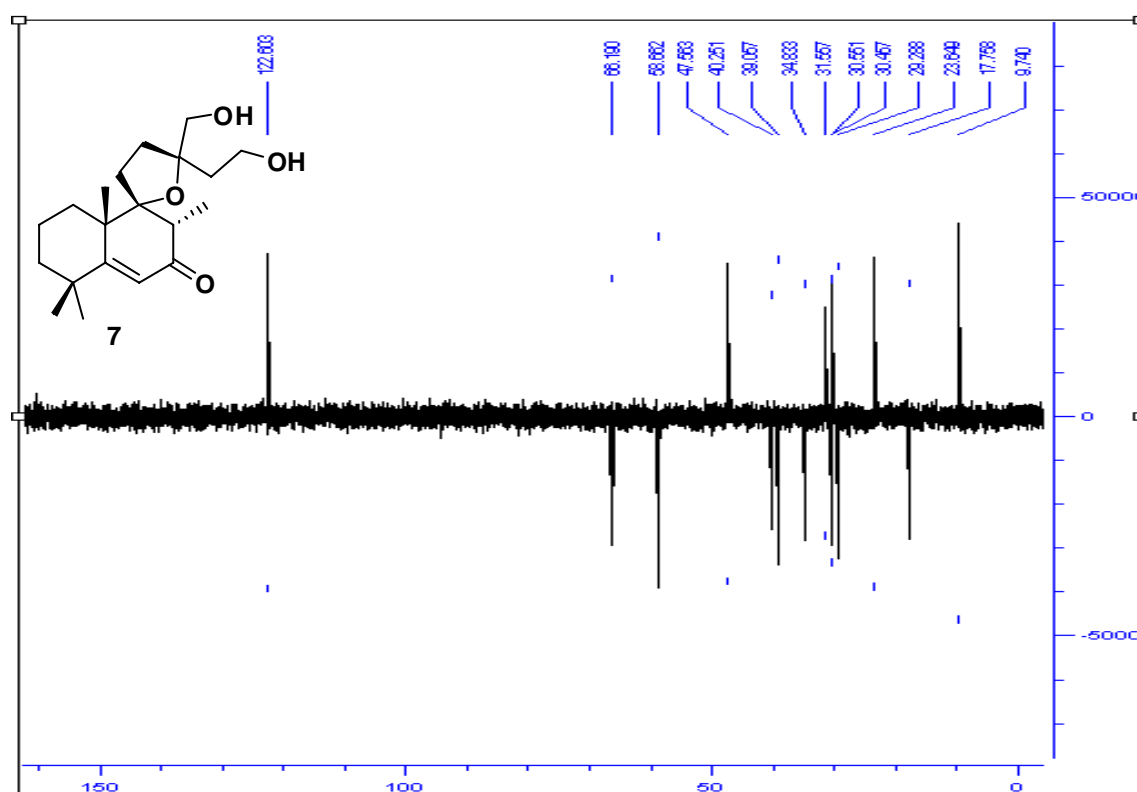

S22.  $^1\text{H}$  NMR (400 MHz,  $\text{CDCl}_3$ ) spectrum of the new compound **8**

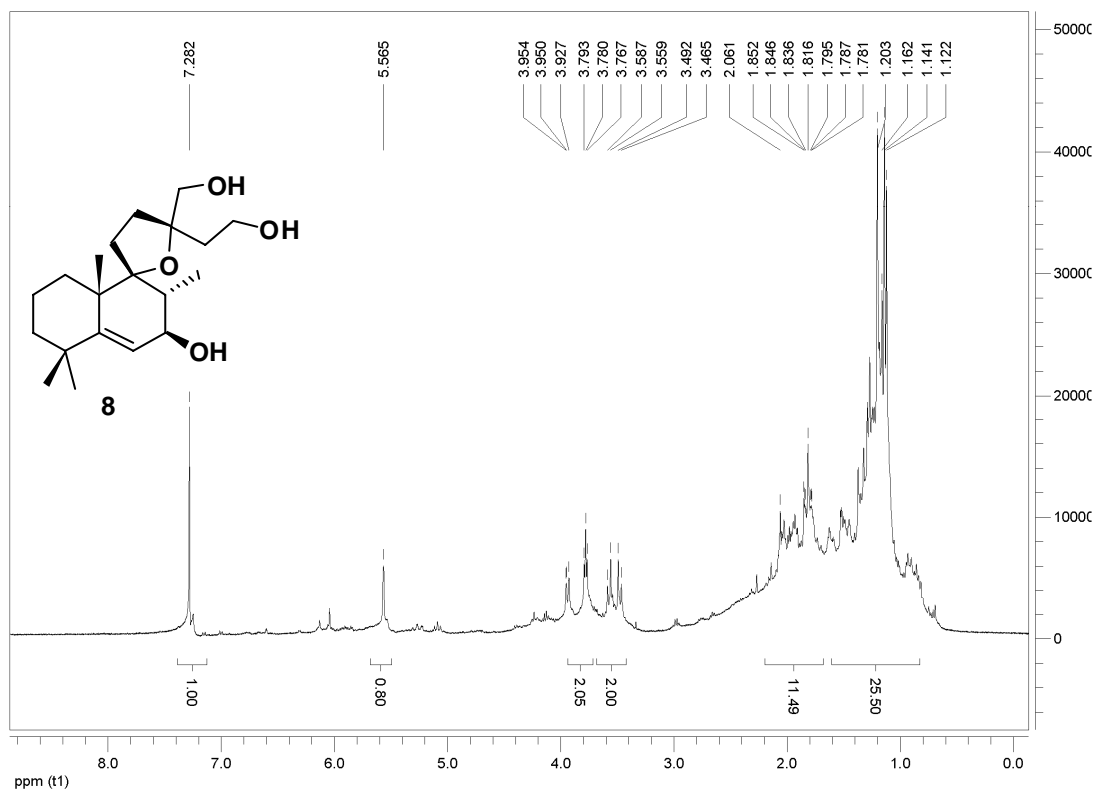

S23. <sup>13</sup>C NMR (100 MHz, CDCl<sub>3</sub>) spectrum of the new compound **8**

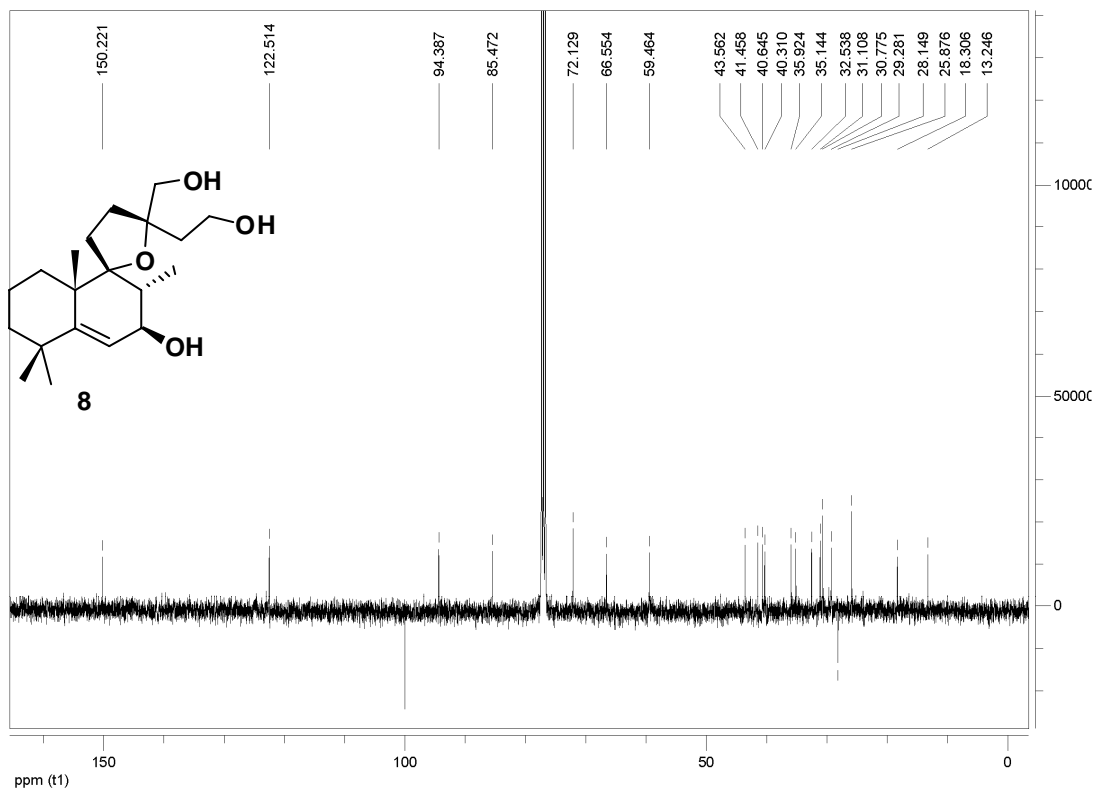

S24. DEPT135 spectrum of **8**

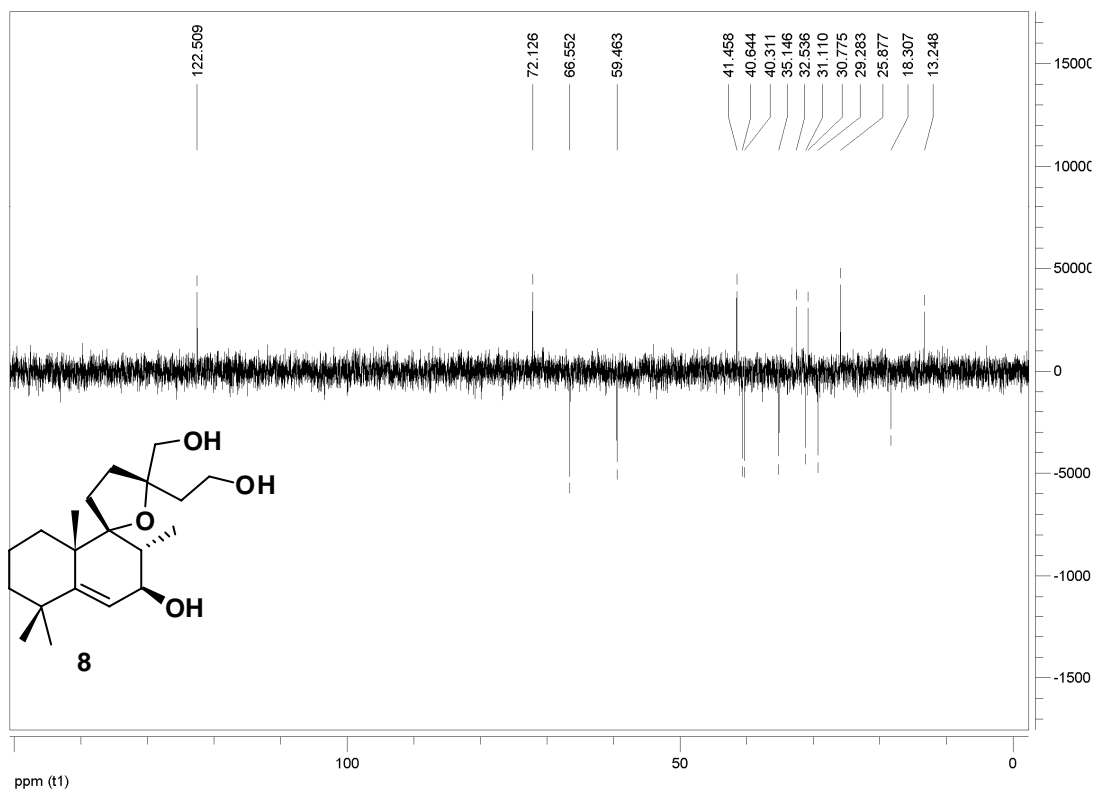

S25. <sup>1</sup>H NMR (400 MHz, CDCl<sub>3</sub>) spectrum of compound 9

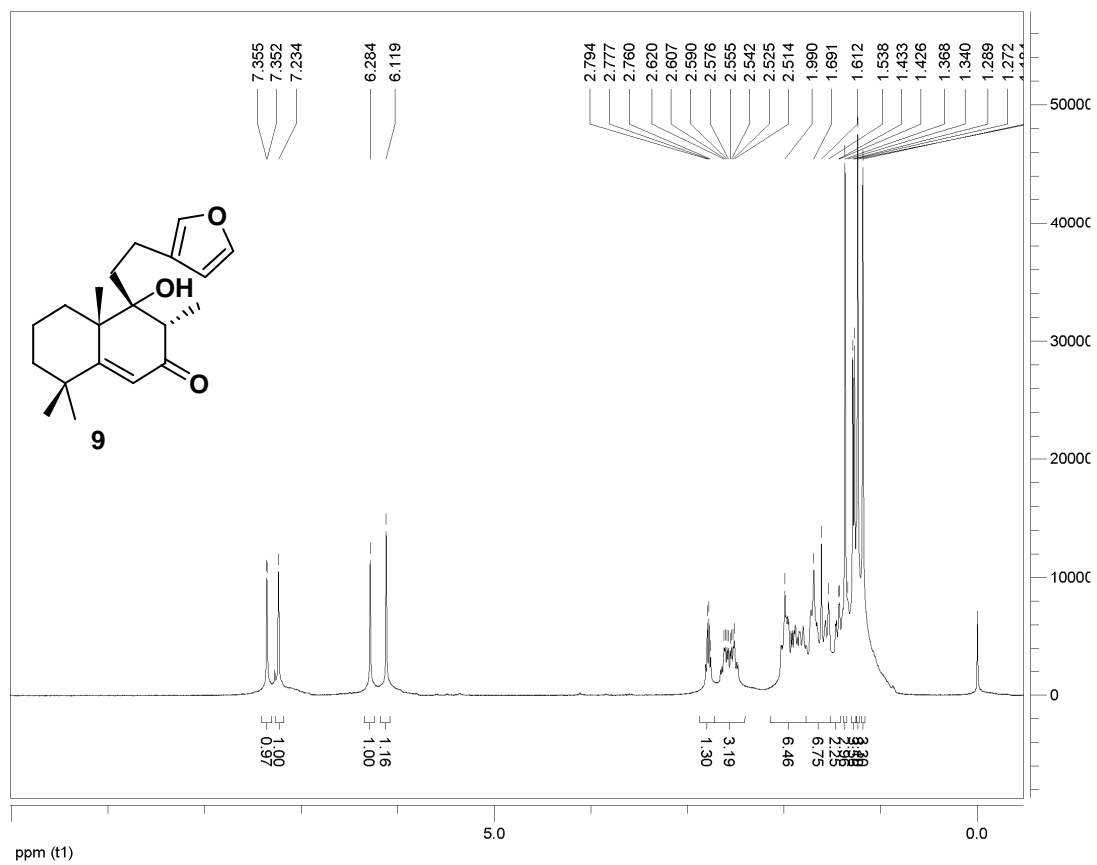

S26.  $^{13}\text{C}$  NMR (100 MHz,  $\text{CDCl}_3$ ) spectrum of compound **9**

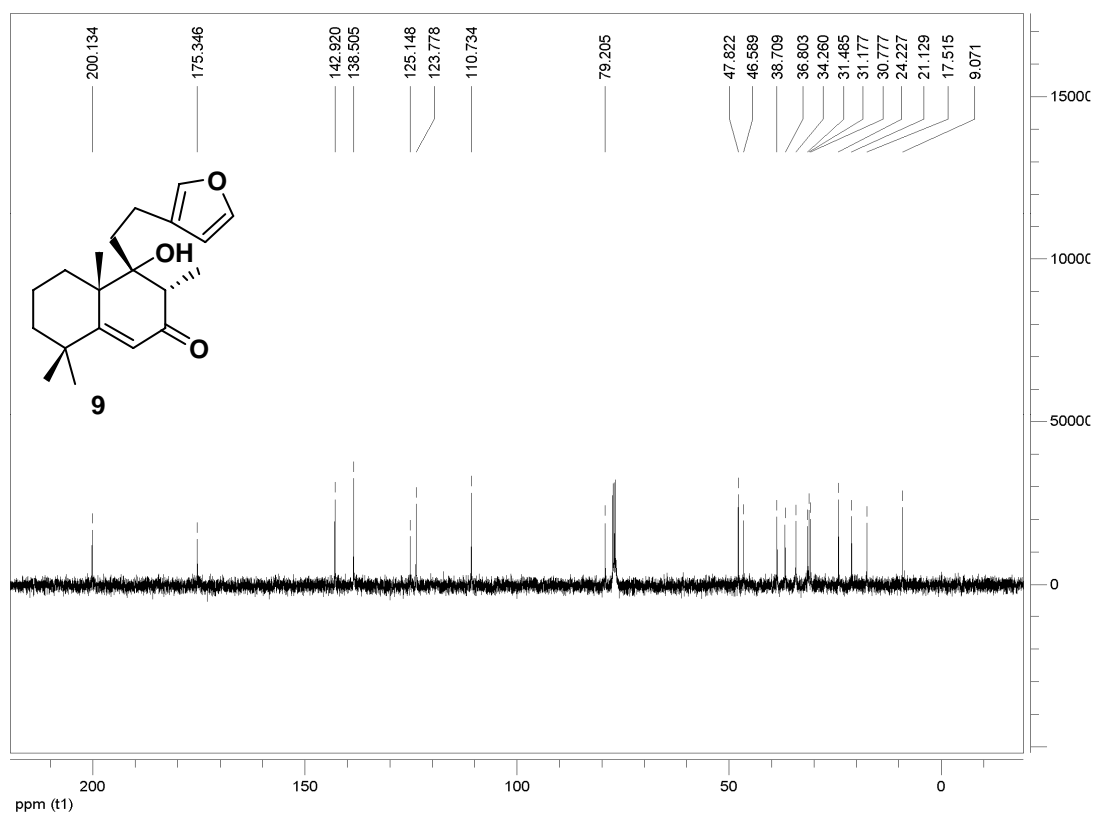

S27. DEPT135 spectrum of **9**

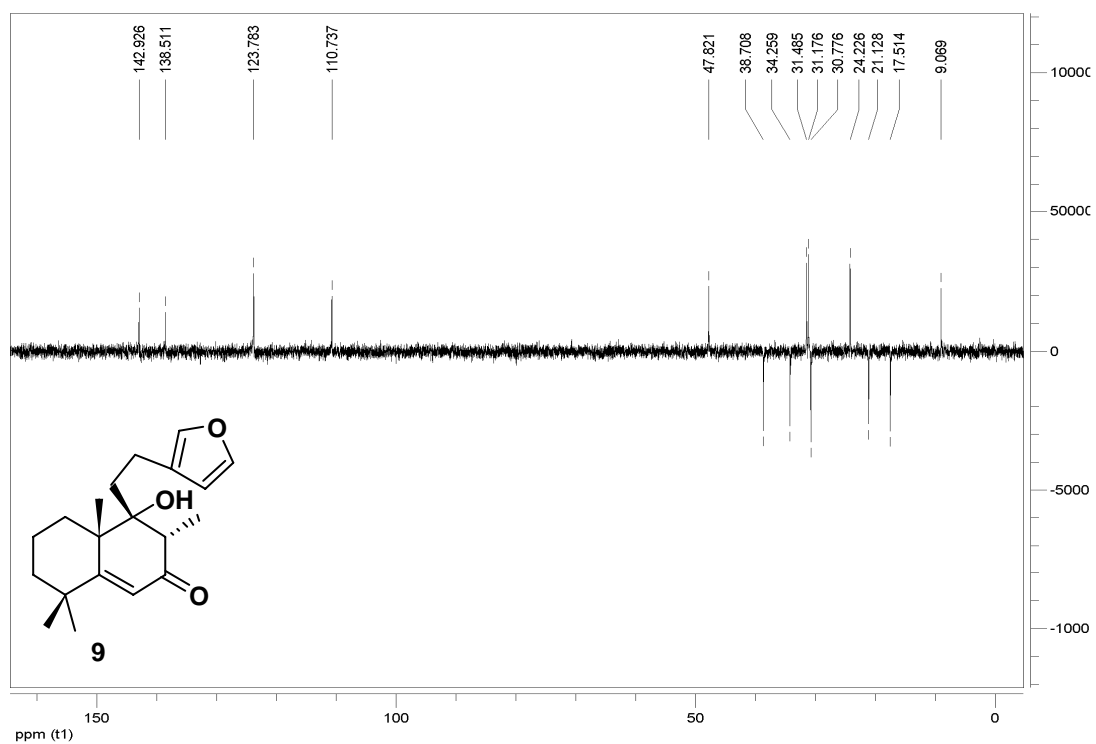

S28.  $^1\text{H}$  NMR (400 MHz,  $\text{CDCl}_3$ ) spectrum of compound **10**



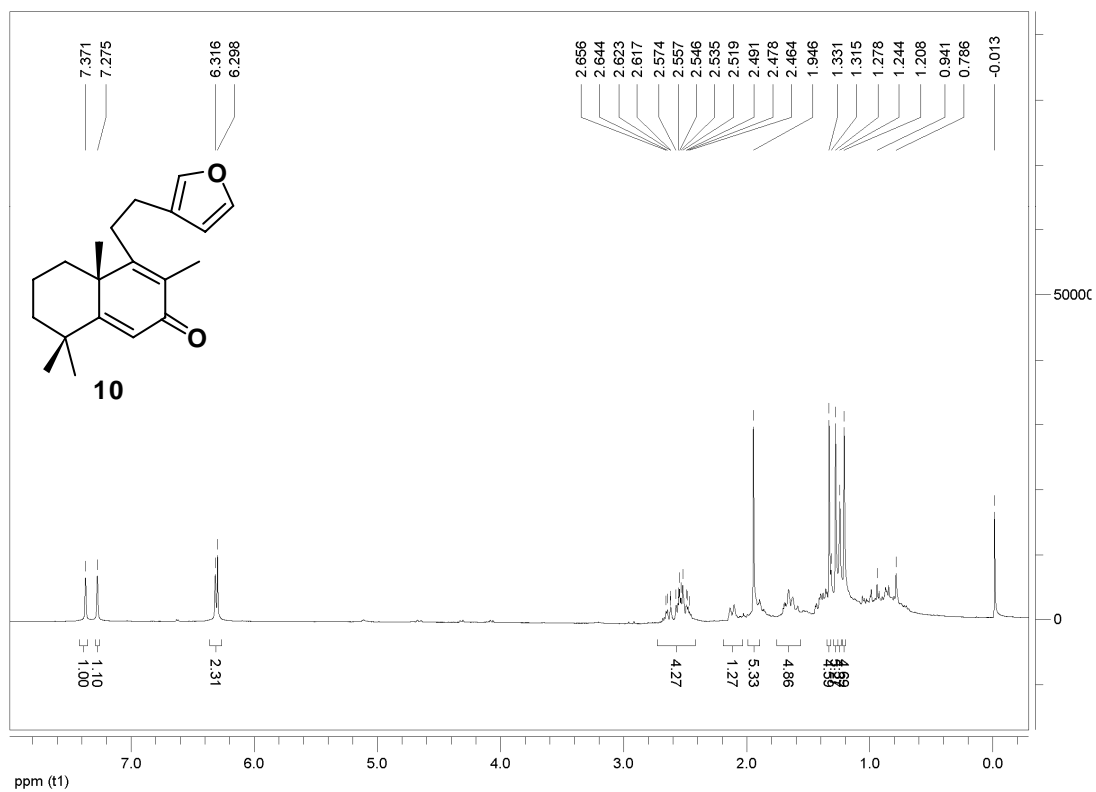

S29.  $^{13}\text{C}$  NMR (100 MHz,  $\text{CDCl}_3$ ) spectrum of compound **10**

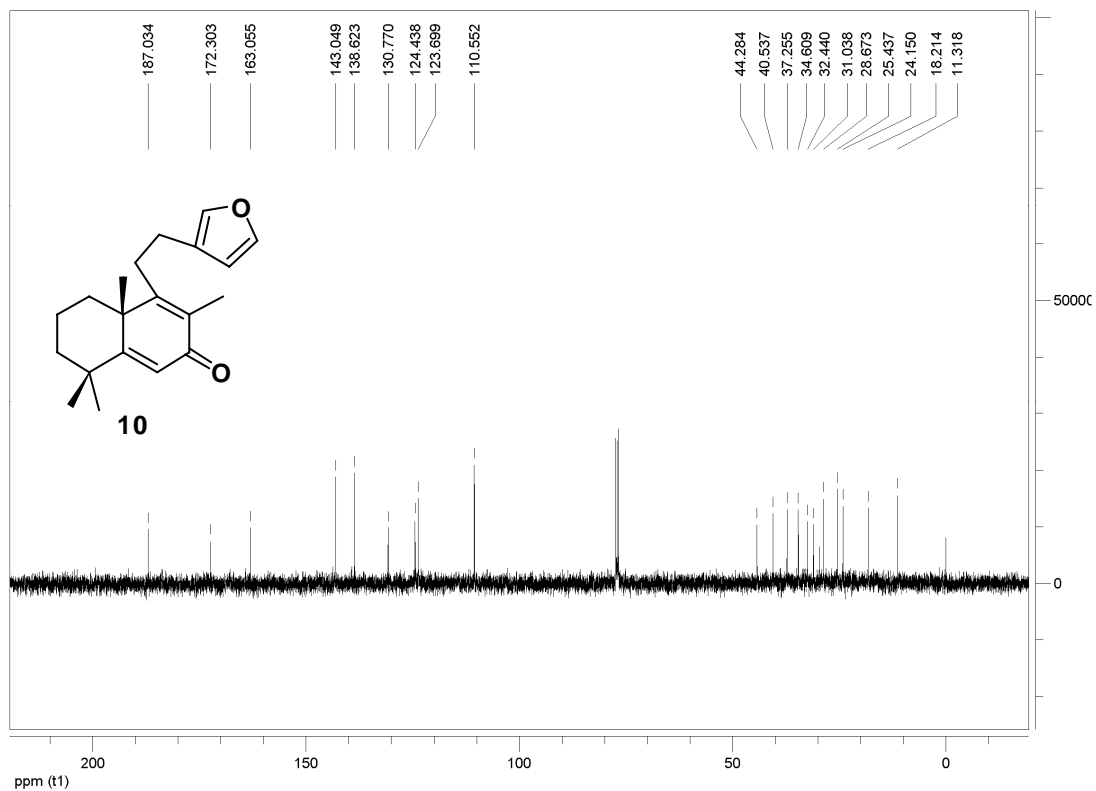

S30. DEPT135 spectrum of **10**

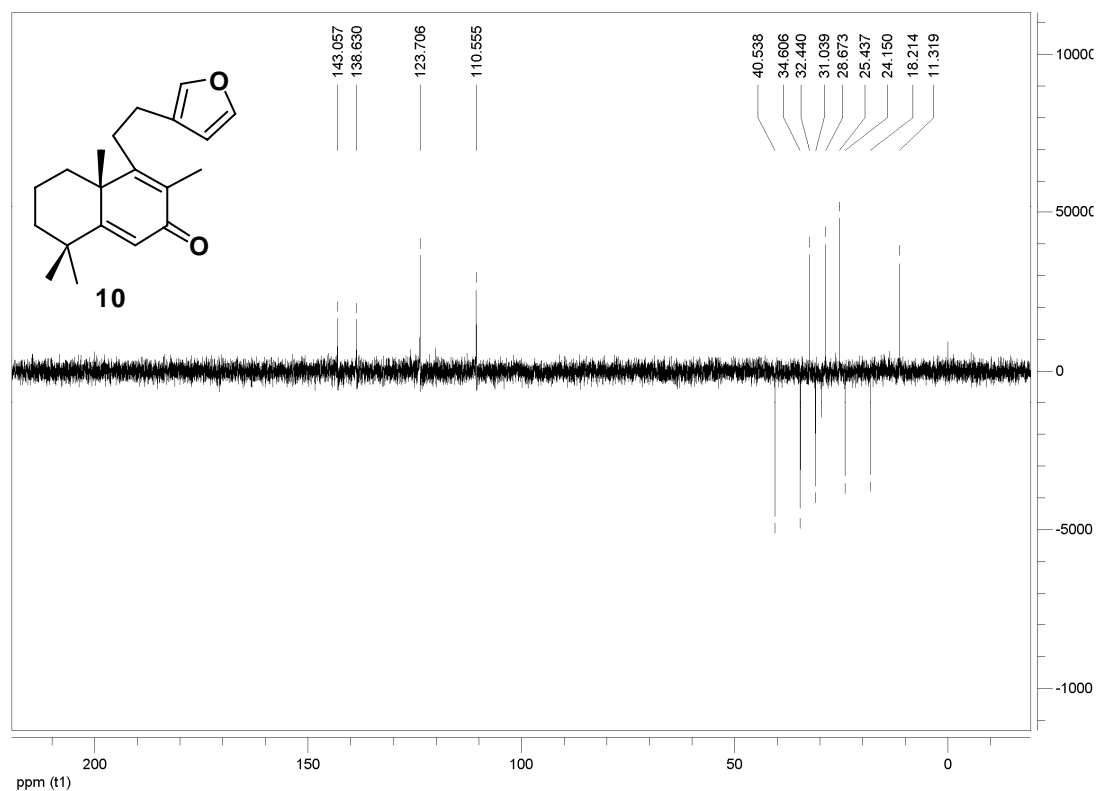

S31.  $^1\text{H}$  NMR (400 MHz,  $\text{CDCl}_3$ ) spectrum of compound **11**

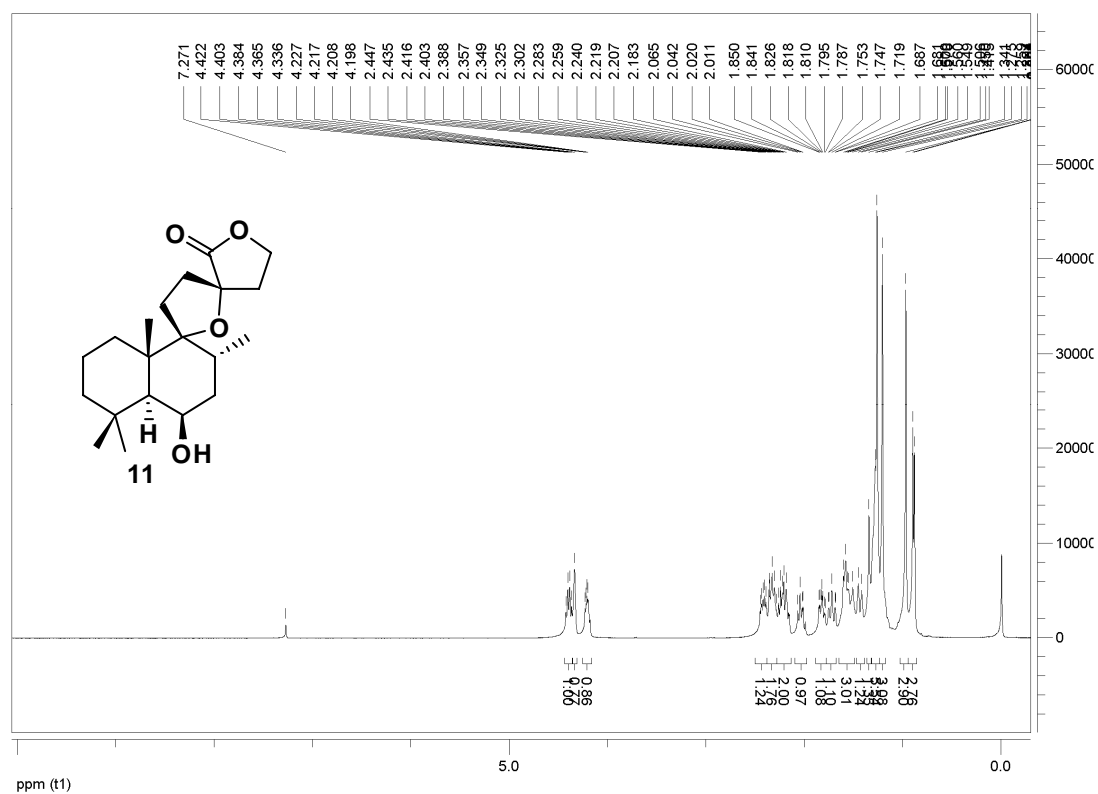

S32.  $^{13}\text{C}$  NMR (100 MHz,  $\text{CDCl}_3$ ) spectrum of compound **11**

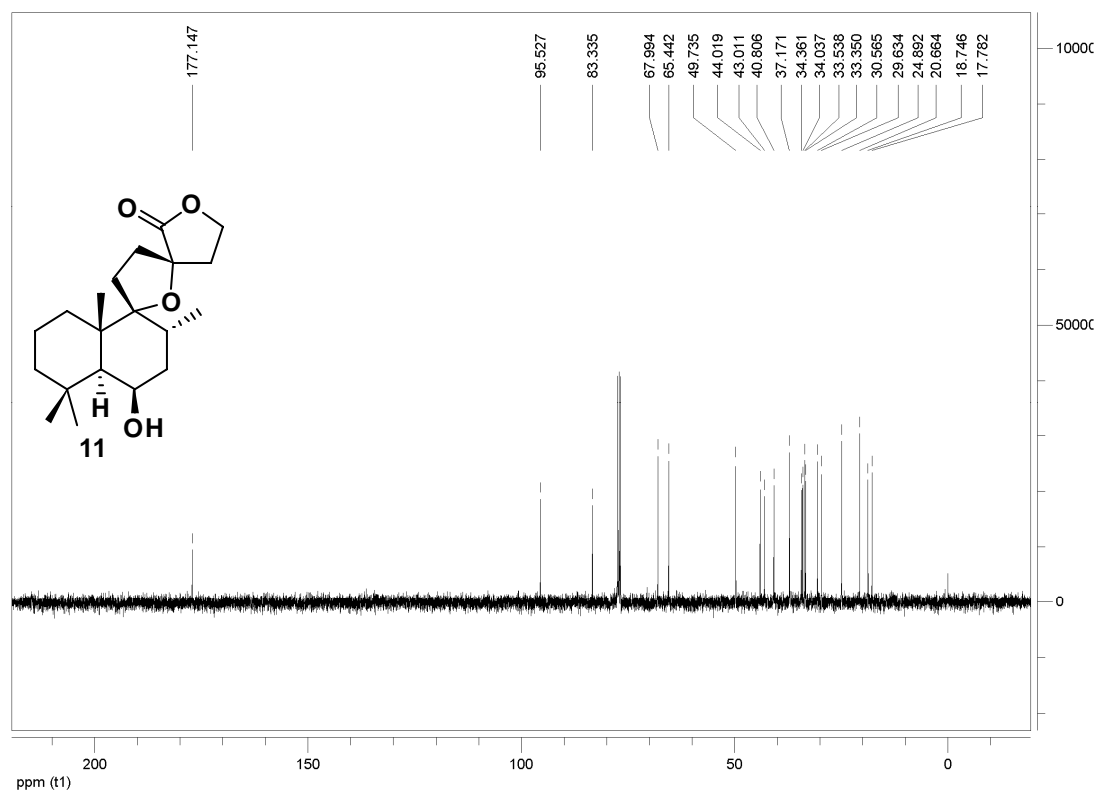

S33. DEPT135 spectrum of **11**

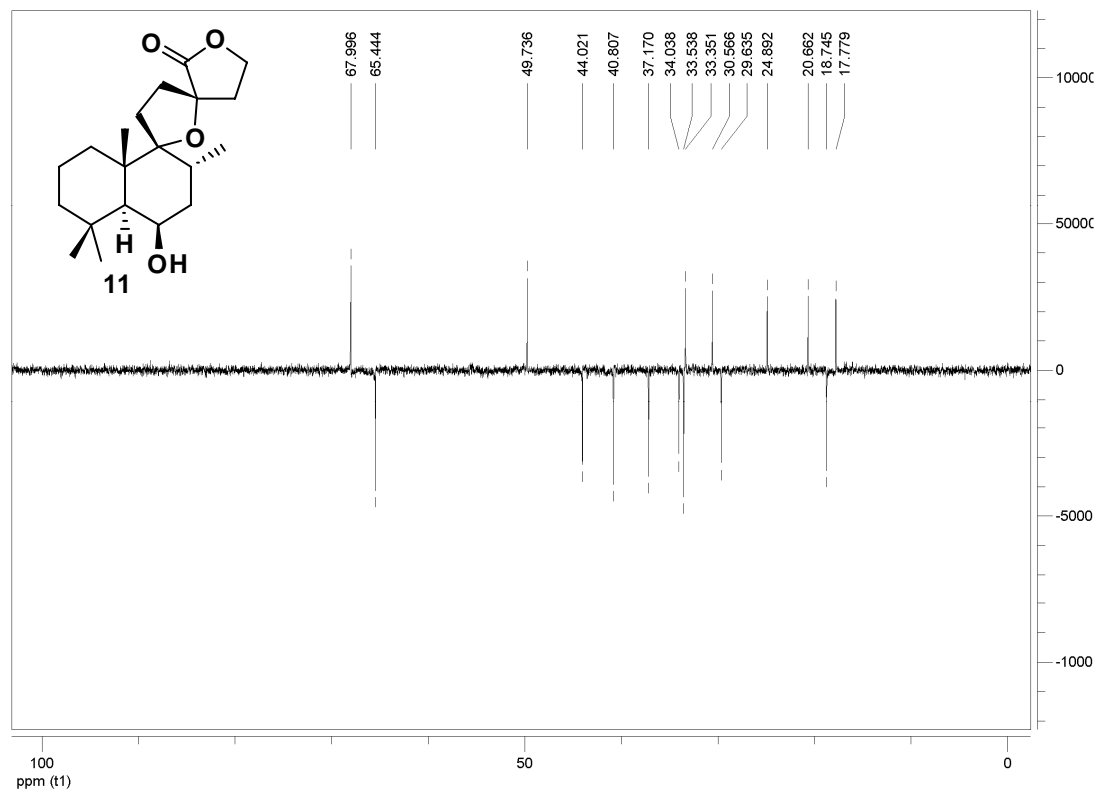

Supplement: NIHMS362475-supplement-01.pdf [file NIHMS362475-supplement-01.pdf]
